# Supplementary material
Source: Springer Nature journal article supplement (https://www.springermedizin.de/resource/supplementary/12906_2010_314_MOESM6_ESM.pdf/9519402)

z1

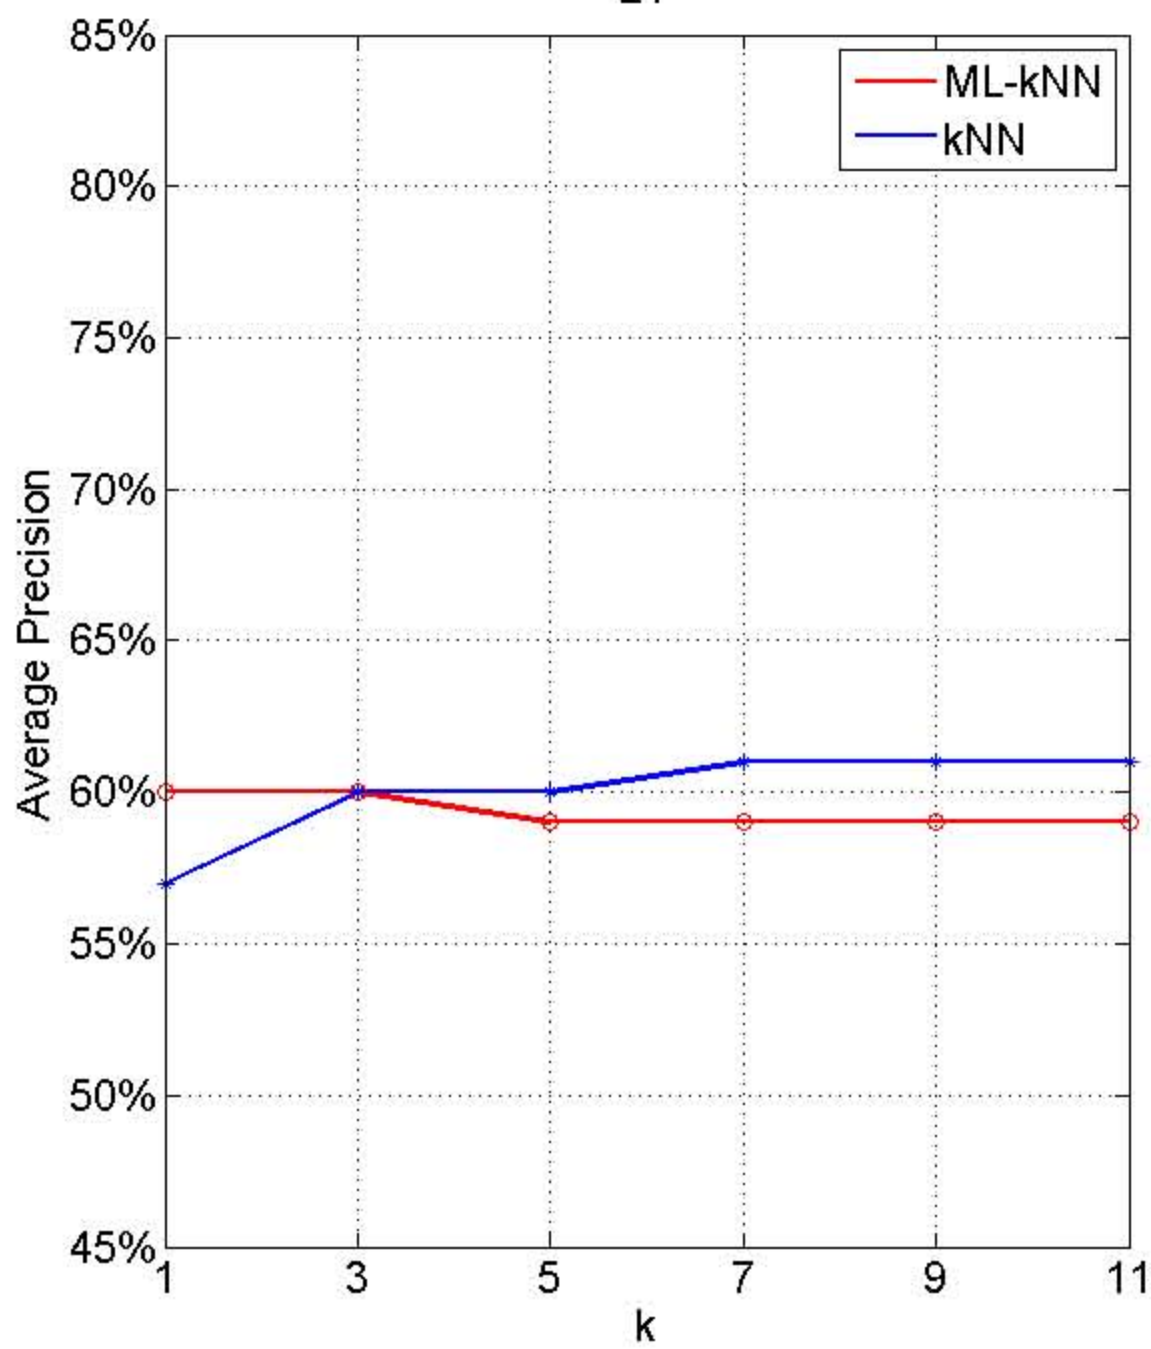

z2

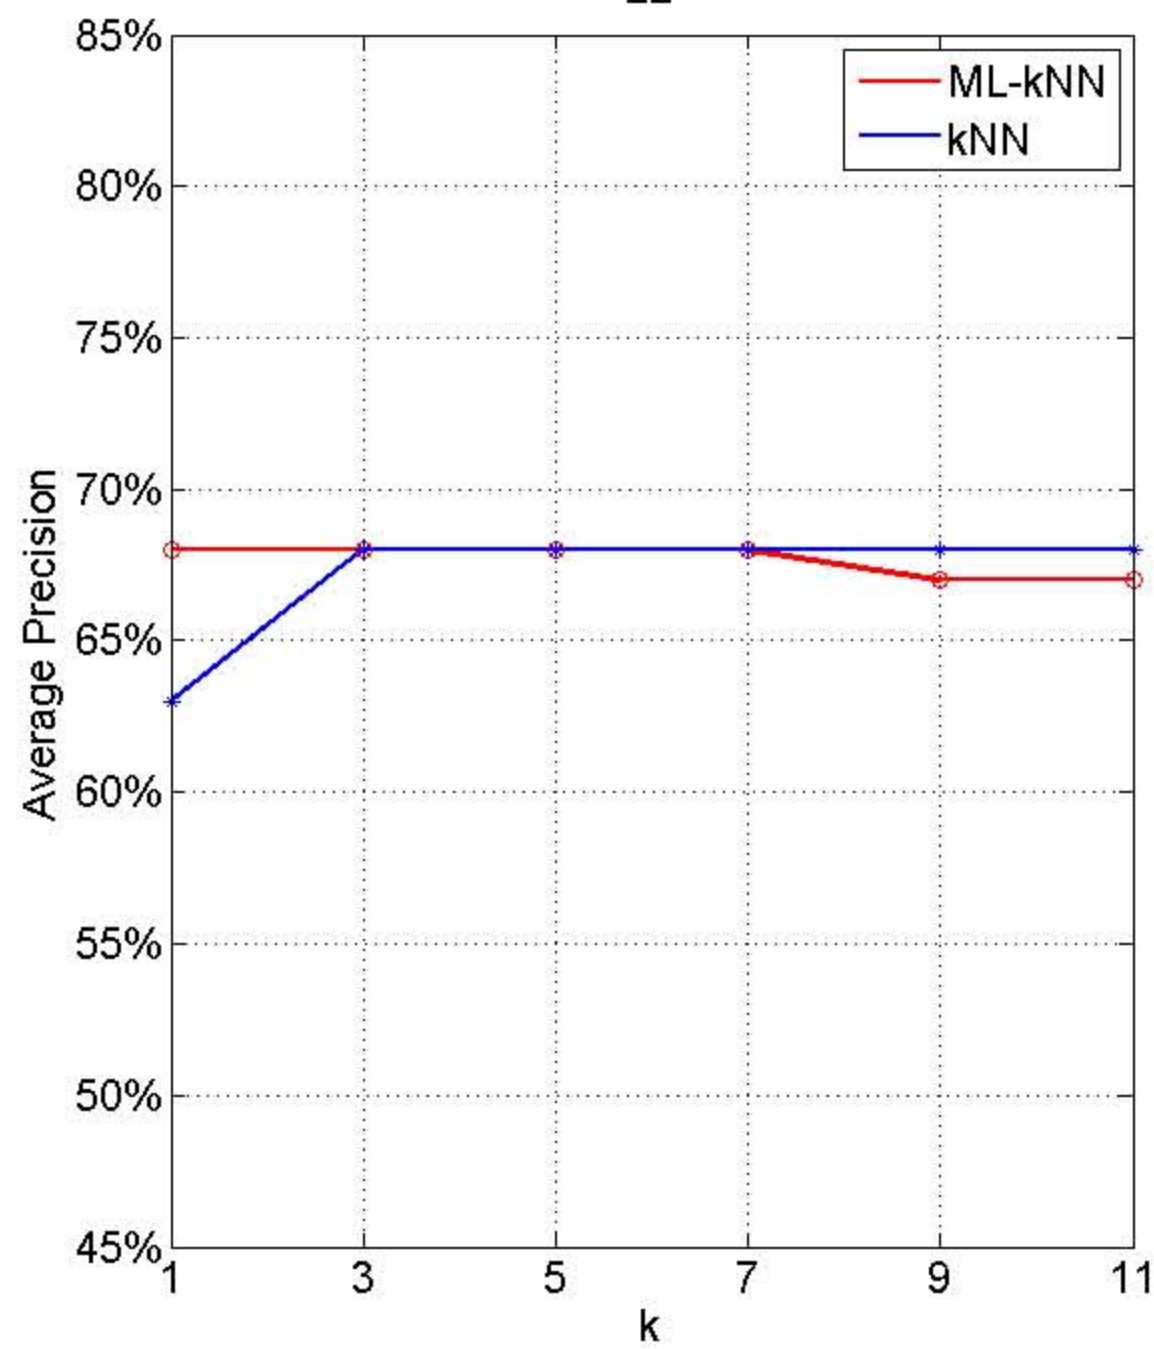

z3

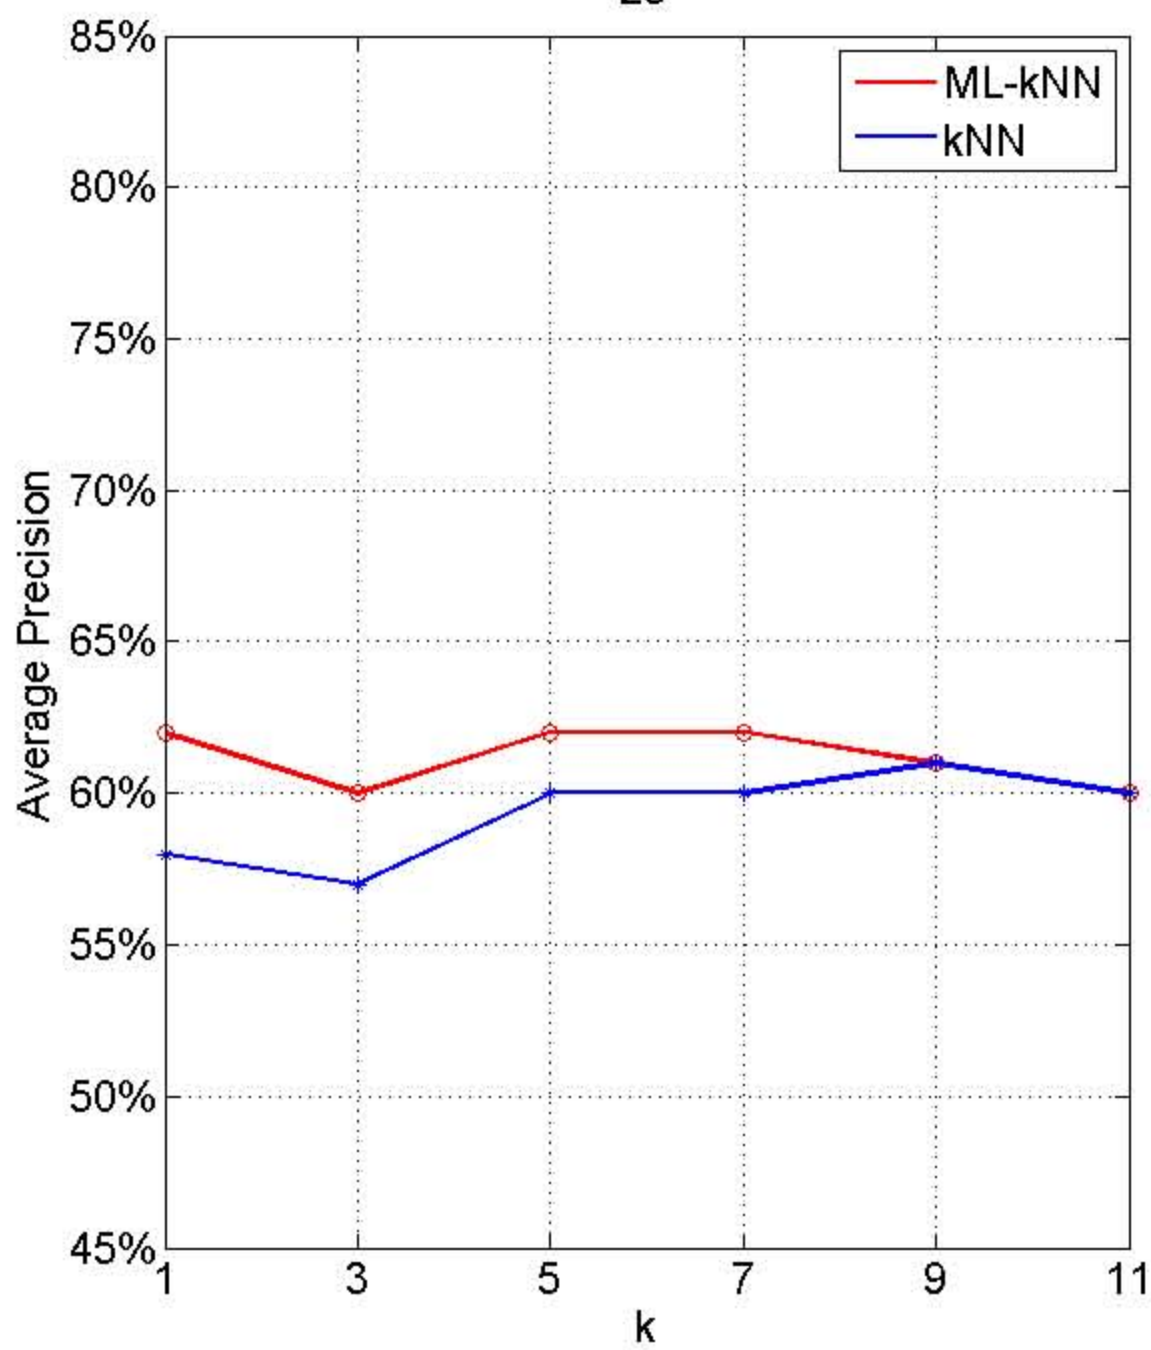

z4

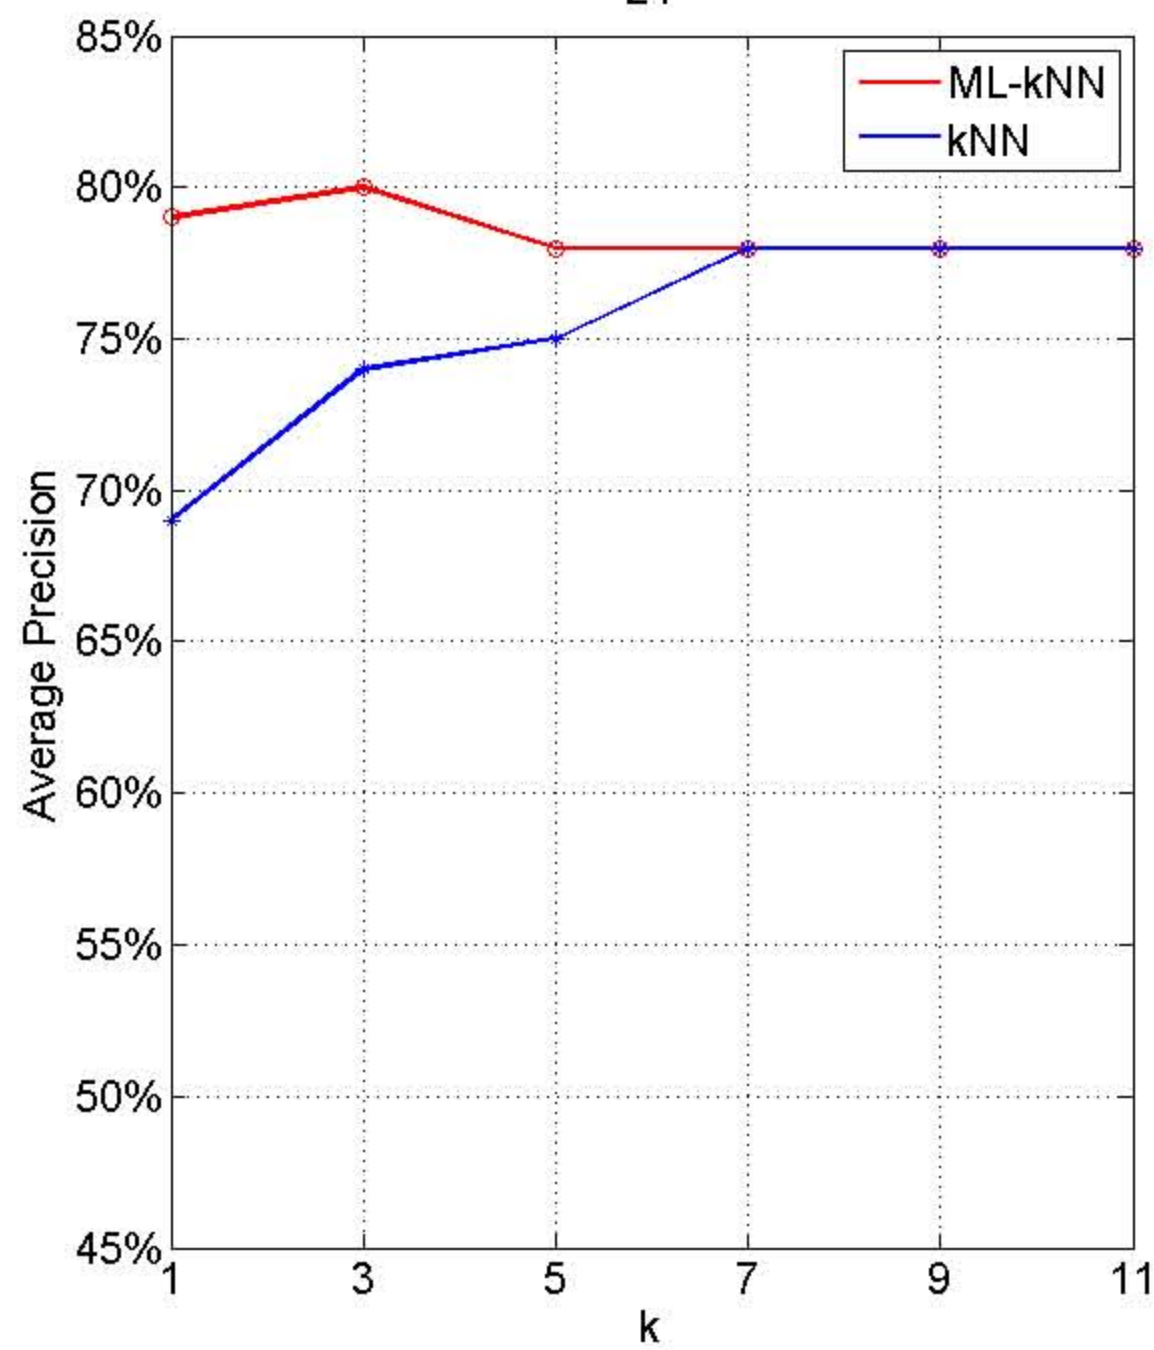

z5

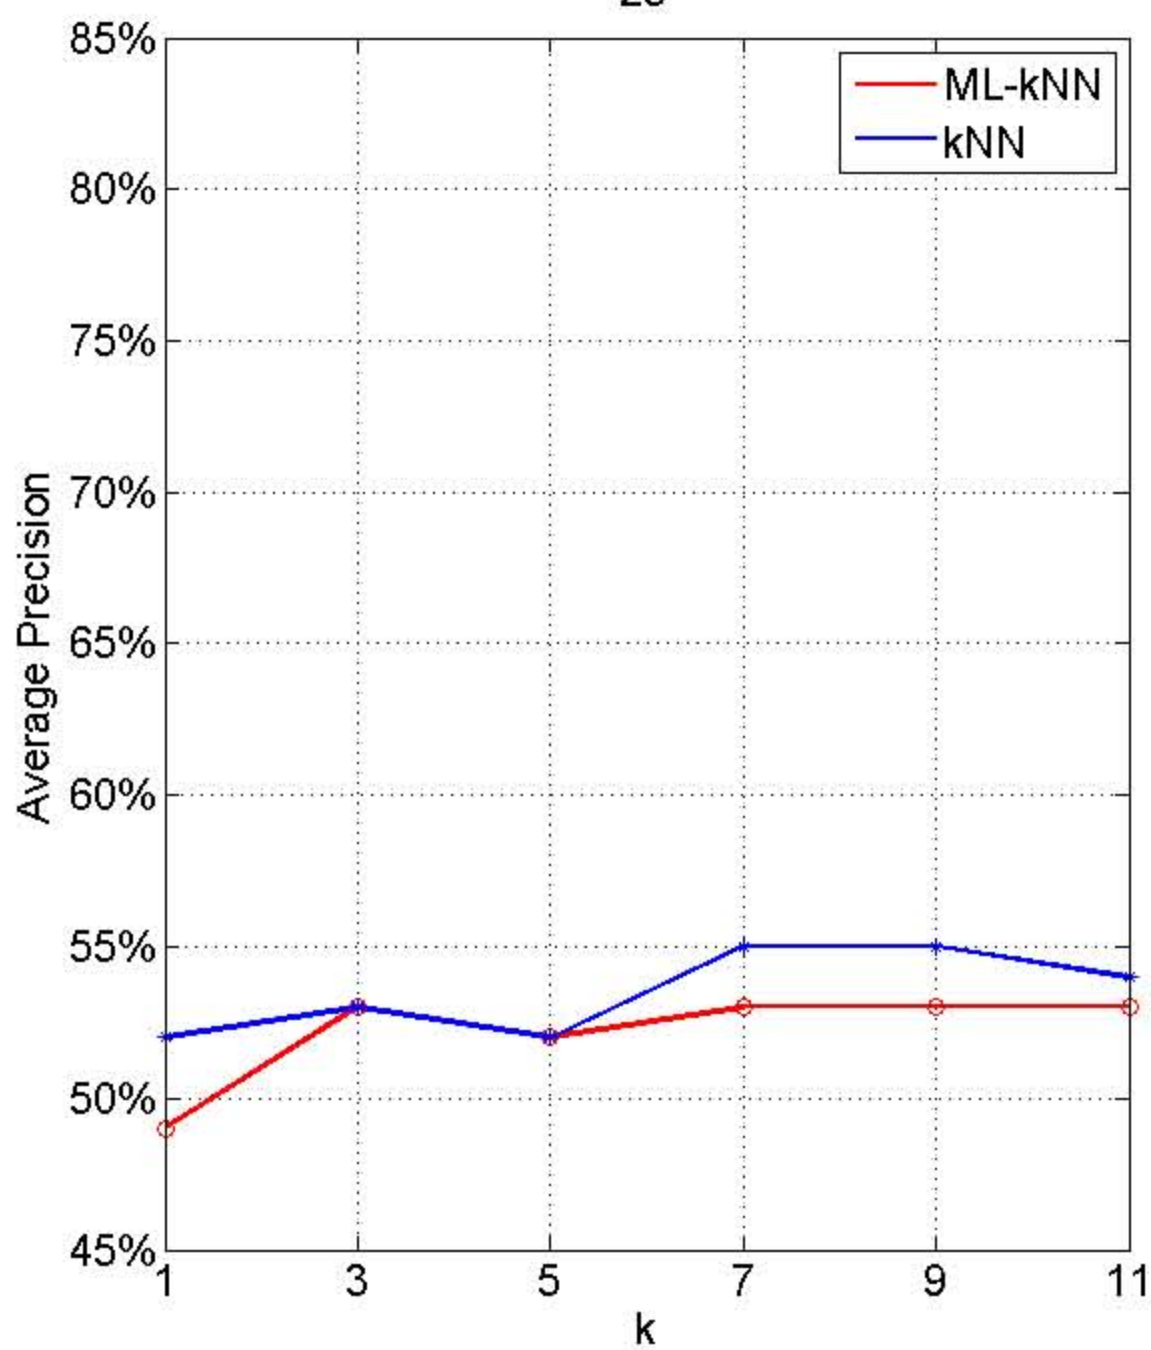

z6

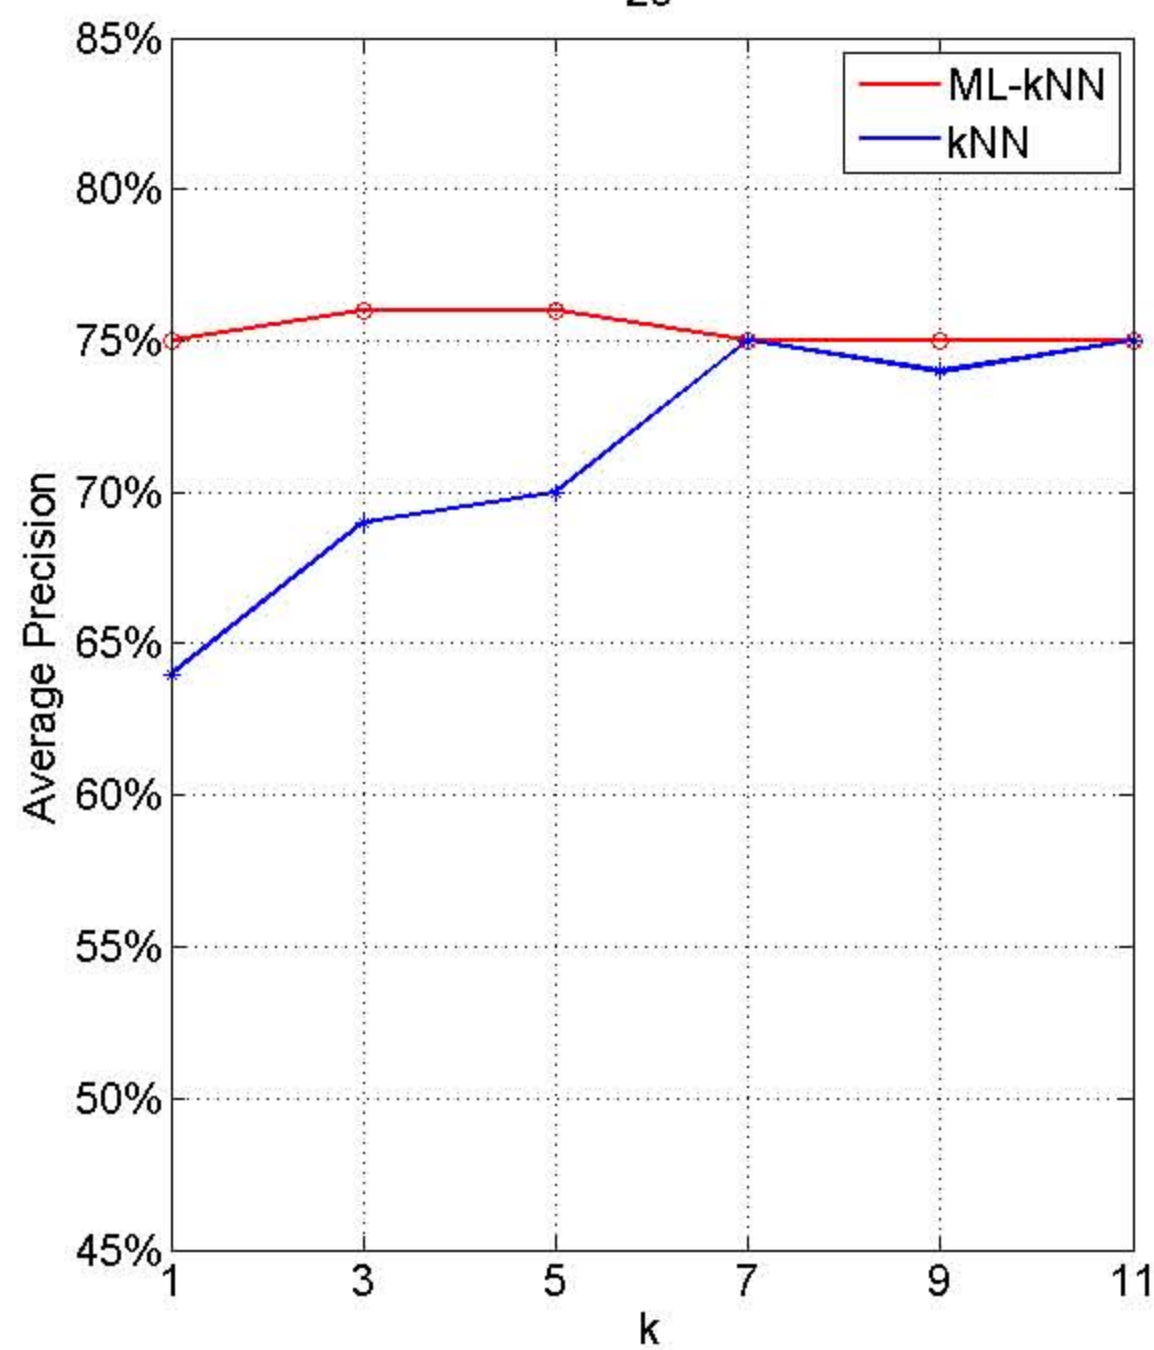

Supplement: MOESM6 [file 9519402]
